# Supplementary material
Source: Springer Nature journal article supplement (https://www.springermedizin.de/resource/supplementary/12916_2013_1116_MOESM1_ESM.pdf/9598530)
Supplement: MOESM1 [file 9598530]

**Distribution of authorised, off-label and unlicensed medicine courses (n = 10 145) by patient age category**

| <b>Patient age category<sup>§</sup></b> | <b>Total patients</b> | <b>Total medicine courses</b> | <b>Total OLUL medicine courses</b> | <b>Total authorised medicine courses implicated in at least one ADR</b> | <b>Total OLUL medicine courses implicated in at least one ADR</b> |
|-----------------------------------------|-----------------------|-------------------------------|------------------------------------|-------------------------------------------------------------------------|-------------------------------------------------------------------|
| <b>Neonate</b>                          | 75 (5.8%)             | 440                           | 259 (58.9%)                        | 10 (5.5%)                                                               | 20 (8%)                                                           |
| <b>Infant</b>                           | 230 (17.9%)           | 1434                          | 441 (30.8%)                        | 52 (5.2%)                                                               | 41 (9%)                                                           |
| <b>Pre-school</b>                       | 390 (30.3%)           | 2934                          | 772 (26.3%)                        | 109 (5.0%)                                                              | 107 (14%)                                                         |
| <b>School-aged</b>                      | 322 (25.0%)           | 2539                          | 743 (29.3%)                        | 108 (6.0%)                                                              | 128 (17%)                                                         |
| <b>Teenage</b>                          | 369 (26.6%)           | 2798                          | 950 (34.0%)                        | 156 (8.4%)                                                              | 115 (12%)                                                         |
| <b>Total</b>                            | 1386 <sup>‡</sup>     | 10145                         | 3165                               | 435                                                                     | 411                                                               |

<sup>§</sup> Neonate 0-27 days, Infant < 1year, Pre-school 1-5 years, School aged 5-11 years, Teenage > 11 years

<sup>‡</sup> Medicine category unknown for all medicines administered to 2/1388 participants
